# Supplementary material
Source: publisher site journal article supplement (https://www.dovepress.com/article/491098)
Supplement: Supplementary file 1 [file get_supplementary_file.php]

# sTable 1. All-cause mortality and Progression among 203 Patients with hematologic malignancies

|  | non-infection (n=116) | mild/moderate infection (n=58) | severe/critical infection (n=29) | statistics | p-value |
| --- | --- | --- | --- | --- | --- |
| All-cause mortality | 12 (10.34%) | 3 (5.17%) | 12 (41.38%) |  | <0.001* |
| Progression | 20 (17.24%) | 11 (18.97%) | 14 (48.28%) | χ2=13.43 | 0.001 |

* Fisher exact

# sTable 2. Overall survival

|  | ALL | | | Non-infection | | Mild/moderate infection | | | Severe/critical infection | |
| --- | --- | --- | --- | --- | --- | --- | --- | --- | --- | --- |
| Day | Rate (%) | 95% CI | Rate (%) | | 95% CI | Rate (%) | 95% CI | Rate (%) | | 95% CI |
| 0-365 | 91.08 | 85.41 - 94.62 | 93.30 | | 85.69 - 96.93 | 95.24 | 82.27 - 98.79 | 76.47 | | 54.96-88.67 |
| 365-730 | 84.03 | 75.80 - 89.65 | 86.86 | | 75.38 - 93.22 | 95.24 | 82.27 - 98.79 | 61.18 | | 38.05-77.89 |
| 730-1095 | 78.24 | 67.62 - 85.73 | 83.00 | | 68.42 - 91.26 | 95.24 | 82.27 - 98.79 | 49.52 | | 26.70-68.80 |
| 1095-1460 | 78.24 | 67.62 - 85.73 | 83.00 | | 68.42 - 91.26 | 95.24 | 82.27 - 98.79 | 49.52 | | 26.70-68.80 |
| 1460-1825 | 78.24 | 67.62 - 85.73 | 83.00 | | 68.42 - 91.26 | 95.24 | 82.27 - 98.79 | 49.52 | | 26.70-68.80 |
| 1825-2190 | 72.65 | 56.55 - 83.60 | 64.56 | | 24.47 - 87.28 | 95.24 | 82.27 - 98.79 | 49.52 | | 26.70-68.80 |
| 2190-2555 | 58.81 | 36.05 - 75.87 | 43.04 | | 7.43 - 76.08 | 47.62 | 0.81 - 89.20 | 49.52 | | 26.70-68.80 |
| 2555-2920 | 58.81 | 36.05 - 75.87 | 43.04 | | 7.43 - 76.08 |  |  | 49.52 | | 26.70-68.80 |
| 2920-3285 | 58.81 | 36.05 - 75.87 |  | |  | 47.62 | 0.81 - 89.20 | 49.52 | | 26.70-68.80 |
| 3285-3650 | 58.81 | 36.05 - 75.87 |  | |  |  |  | 49.52 | | 26.70-68.80 |
| 3650-4015 | 0.00 | NA. | . | |  |  |  | 0.00 | | NA |

# sTable 3. Progression-free survival

|  | ALL | | Non-infection | | Mild/moderate infection | | | Severe/critical infection | |
| --- | --- | --- | --- | --- | --- | --- | --- | --- | --- |
| Day | Rate (%) | 95% CI | Rate (%) | 95% CI | | Rate (%) | 95% CI | Rate (%) | 95% CI |
| 0-365 | 86.75 | 80.41 - 91.15 | 90.00 | 81.66 - 94.67 | | 90.59 | 76.84 - 96.36 | 69.23 | 47.80 -83.26 |
| 365-730 | 76.34 | 67.31 - 83.19 | 81.53 | 69.38 -89.22 | | 75.90 | 53.88 - 88.43 | 59.34 | 37.18 -75.93 |
| 730-1095 | 67.25 | 55.90 - 76.29 | 74.12 | 58.15 - 84.75 | | 67.91 | 42.06 - 84.12 | 48.04 | 26.08 -67.04 |
| 1095-1460 | 59.78 | 46.67 – 70.65 | 63.14 | 42.56 - 78.07 | | 56.59 | 26.97 - 78.08 | 48.04 | 26.08 -67.04 |
| 1460-1825 | 53.14 | 38.53 - 65.76 | 54.12 | 29.89 - 73.19 | | 56.59 | 26.97 - 78.08 | 41.18 | 19.67 -61.62 |
| 1825-2190 | 48.89 | 33.32 - 62.75 | 38.66 | 11.49 - 65.87 | | 56.59 | 26.97 - 78.08 | 41.18 | 19.67 -61.62 |
| 2190-2555 | 38.59 | 21.73 - 55.22 | 19.33 | 1.32 - 53.57 | | 28.30 | 1.78 - 67.33 | 41.18 | 19.67 -61.62 |
| 2555-2920 | 31.58 | 14.43 - 50.34 | 19.33 | 1.32 - 53.57 | | 0.00 | .NA | 41.18 | 19.67 -61.62 |
| 2920-3285 | 31.58 | 14.43 - 50.34 |  |  | |  |  | 41.18 | 19.67 -61.62 |
| 3285-3650 | 31.58 | 14.43 - 50.34 |  |  | |  |  | 41.18 | 19.67 -61.62 |
| 3650-4015 | 0.00 | NA |  |  | |  |  | 0.00 | NA |
